# Supplementary material for: Nanostructured lipid carrier (NLC)-based novel hydrogels as potential carriers for nepafenac applied after cataract surgery for the treatment of inflammation: design, characterization and in vitro cellular inhibition and uptake studies
Source: Royal Society of Chemistry journal article supplement (doi:10.1039/c7ra00552k), 2017-01-01
Supplement: c7ra00552k1.pdf [file c7ra00552k1.pdf]

## Supporting Information

### **Nanostructured lipid carriers (NLC)-based novel hydrogels as potential carriers for nepafenac applied after cataract surgery for the treatment of inflammation: design, characterization and in vitro cellular inhibition and uptake studies**

Shihui Yu<sup>a</sup>, Guoxin Tan<sup>a</sup>, Dandan Liu<sup>b</sup>, Xinggong Yang<sup>a</sup>, Weisan Pan<sup>a\*</sup>

<sup>a</sup> Department of Pharmaceutics, School of Pharmacy, Shenyang Pharmaceutical University, 103 Wenhua Road, Shenyang 110016, China

<sup>b</sup> School of Biomedical & Chemical Engineering, Liaoning Institute of Science and Technology, Benxi 117004, PR China

\* Corresponding author: Weisan Pan Ph.D.

E-mail: [pppwwwsss@163.com](mailto:pppwwwsss@163.com);

Department of Pharmaceutics, School of Pharmacy

Shenyang Pharmaceutical University

103 Wenhua Road, Shenyang 110016, China

Tel: +86 02443520533.

Table S1 Independent variables and their corresponding levels in NP-NLC preparation.

| Independent variables                           | Levels |      |      |      |       |
|-------------------------------------------------|--------|------|------|------|-------|
|                                                 | -1.682 | -1   | 0    | 1    | 1.682 |
| X <sub>1</sub> : nepafenac concentration (%)    | 0.07   | 0.08 | 0.10 | 0.12 | 0.13  |
| X <sub>2</sub> : liquid lipid concentration (%) | 0.56   | 0.70 | 0.90 | 1.10 | 1.24  |
| X <sub>3</sub> : the CRE/SOY ratio              | 1.16   | 1.50 | 2.00 | 2.50 | 2.84  |

A three-factor, five-level central composite design was generated to optimize the NP-NLC preparation. The study design involved investigating the effects of three independent variables, including the NP concentration (X<sub>1</sub>), the MIG concentration (X<sub>2</sub>), and the CRE/SOY ratio (X<sub>3</sub>). The dependent variables were the mean particle size (PS, Y<sub>1</sub>), polydispersity index (PI, Y<sub>2</sub>) and entrapment efficiency (EE, Y<sub>3</sub>).

Table S2 Coded levels and measured responses for the 20 experiment formulation runs.

|                  | Coded levels of factors |                |                | Measured responses |                |                |
|------------------|-------------------------|----------------|----------------|--------------------|----------------|----------------|
|                  | X <sub>1</sub>          | X <sub>2</sub> | X <sub>3</sub> | Y <sub>1</sub>     | Y <sub>2</sub> | Y <sub>3</sub> |
| Factorial points |                         |                |                |                    |                |                |
| 1                | -1                      | -1             | -1             | 99.75±2.02         | 0.27±0.02      | 95.01±0.34     |
| 2                | +1                      | -1             | -1             | 156.18±2.72        | 0.48±0.08      | 59.39±1.89     |
| 3                | -1                      | +1             | -1             | 134.25±1.45        | 0.35±0.01      | 84.79±1.03     |
| 4                | -1                      | -1             | +1             | 156.47±2.88        | 0.59±0.00      | 63.54±1.20     |
| 5                | +1                      | +1             | -1             | 97.31±0.87         | 0.23±0.04      | 91.07±0.91     |
| 6                | +1                      | -1             | +1             | 100.01±1.98        | 0.43±0.00      | 84.25±0.76     |
| 7                | -1                      | +1             | +1             | 112.13±3.01        | 0.41±0.02      | 75.46±1.26     |
| 8                | +1                      | +1             | +1             | 107.79±1.36        | 0.31±0.02      | 78.43±0.45     |
| Axial points     |                         |                |                |                    |                |                |
| 9                | -1.682                  | 0              | 0              | 113.95±1.34        | 0.31±0.01      | 78.43±0.33     |
| 10               | +1.682                  | 0              | 0              | 152.85±5.22        | 0.37±0.03      | 55.29±2.03     |
| 11               | 0                       | -1.682         | 0              | 95.79±1.11         | 0.33±0.03      | 95.03±0.33     |
| 12               | 0                       | +1.682         | 0              | 126.91±2.09        | 0.36±0.01      | 88.43±0.42     |
| 13               | 0                       | 0              | -1.682         | 156.83±1.83        | 0.58±0.04      | 82.13±0.84     |
| 14               | 0                       | 0              | +1.682         | 91.37±1.73         | 0.31±0.02      | 92.73±0.69     |
| Centre points    |                         |                |                |                    |                |                |
| 15               | 0                       | 0              | 0              | 110.43±1.88        | 0.30±0.04      | 85.47±1.03     |
| 16               | 0                       | 0              | 0              | 103.15±2.35        | 0.30±0.00      | 84.27±0.89     |
| 17               | 0                       | 0              | 0              | 105.65±1.45        | 0.32±0.02      | 84.78±1.24     |
| 18               | 0                       | 0              | 0              | 107.55±2.02        | 0.31±0.03      | 85.41±1.30     |
| 19               | 0                       | 0              | 0              | 107.49±1.82        | 0.31±0.01      | 86.03±1.39     |
| 20               | 0                       | 0              | 0              | 105.65±1.56        | 0.30±0.04      | 85.13±0.95     |

X<sub>1</sub> is factor of nepafenac concentration (%), X<sub>2</sub> is factor of liquid lipid concentration (%), and X<sub>3</sub> is factor of the CRE/SOY ratio. Y<sub>1</sub> is response of the mean particle size (PS), Y<sub>2</sub> is response of polydispersity index (PI) and Y<sub>3</sub> is response of entrapment efficiency (EE).

Table S3 Fit summary for of measured responses.

|                                 | Sum of squares |                |                | df                |                |                | F-value            |                |                | P-value (prob>F) |                |                |                |                |                |
|---------------------------------|----------------|----------------|----------------|-------------------|----------------|----------------|--------------------|----------------|----------------|------------------|----------------|----------------|----------------|----------------|----------------|
|                                 | Y <sub>1</sub> | Y <sub>2</sub> | Y <sub>3</sub> | Y <sub>1</sub>    | Y <sub>2</sub> | Y <sub>3</sub> | Y <sub>1</sub>     | Y <sub>2</sub> | Y <sub>3</sub> | Y <sub>1</sub>   | Y <sub>2</sub> | Y <sub>3</sub> |                |                |                |
| sequential model sum of squares |                |                |                |                   |                |                |                    |                |                |                  |                |                |                |                |                |
| Linear                          | 6567.20        | 0.08           | 868.15         | 3                 | 3              | 3              | 13.15              | 4.58           | 3.21           | 0.0001           | 0.0169         | 0.0511         |                |                |                |
| 2F1                             | 1037.08        | 0.027          | 636.32         | 3                 | 3              | 3              | 2.76               | 1.71           | 3.43           | 0.0843           | 0.2134         | 0.0494         |                |                |                |
| Quadratic                       | 1403.96        | 0.037          | 784.20         | 3                 | 3              | 3              | 20.99              | 4.14           | 127.30         | 0.0001           | 0.0377         | <0.0001        |                |                |                |
| Cubic                           | 154.81         | 0.030          | 10.26          | 4                 | 4              | 4              | 3.41               | 123.53         | 1.50           | 0.0880           | <0.0001        | 0.3130         |                |                |                |
| Residual                        | 68.12          | 0.0004         | 10.27          | 6                 | 6              | 6              | -                  | -              | -              | -                | -              | -              |                |                |                |
| Total                           | 283400         | 2.74           | 137600         | 20                | 20             | 20             | -                  | -              | -              | -                | -              | -              |                |                |                |
|                                 | Sum of squares |                |                | df                |                |                | F-value            |                |                | P-value (prob>F) |                |                |                |                |                |
|                                 | Y <sub>1</sub> | Y <sub>2</sub> | Y <sub>3</sub> | Y <sub>1</sub>    | Y <sub>2</sub> | Y <sub>3</sub> | Y <sub>1</sub>     | Y <sub>2</sub> | Y <sub>3</sub> | Y <sub>1</sub>   | Y <sub>2</sub> | Y <sub>3</sub> |                |                |                |
| Lack-of-fit                     |                |                |                |                   |                |                |                    |                |                |                  |                |                |                |                |                |
| Linear                          | 2633.91        | 0.093          | 1439.20        | 11                | 11             | 11             | 39.84              | 127.28         | 353.60         | 0.7544           | 0.6598         | 0.6093         |                |                |                |
| 2F1                             | 1596.83        | 0.067          | 802.88         | 8                 | 8              | 8              | 33.21              | 125.25         | 271.23         | 0.8216           | 0.7234         | 0.6402         |                |                |                |
| Quadratic                       | 192.87         | 0.030          | 18.68          | 5                 | 5              | 5              | 6.42               | 88.78          | 10.10          | 0.8912           | 0.7891         | 0.6731         |                |                |                |
| Cubic                           | 38.06          | 0.00003        | 8.42           | 1                 | 1              | 1              | 6.33               | 0.39           | 22.77          | 0.7834           | 0.5618         | 0.4250         |                |                |                |
| Pure                            | 30.05          | 0.00033        | 1.85           | 5                 | 5              | 5              | -                  | -              | -              | -                | -              | -              |                |                |                |
| Error                           |                |                |                |                   |                |                |                    |                |                |                  |                |                |                |                |                |
|                                 | R-squared      |                |                | Adjusted R-square |                |                | Predicted R-square |                |                | PRESS            |                |                | Std. deviation |                |                |
|                                 | Y <sub>1</sub> | Y <sub>2</sub> | Y <sub>3</sub> | Y <sub>1</sub>    | Y <sub>2</sub> | Y <sub>3</sub> | Y <sub>1</sub>     | Y <sub>2</sub> | Y <sub>3</sub> | Y <sub>1</sub>   | Y <sub>2</sub> | Y <sub>3</sub> | Y <sub>1</sub> | Y <sub>2</sub> | Y <sub>3</sub> |
| Model summary statistics        |                |                |                |                   |                |                |                    |                |                |                  |                |                |                |                |                |
| Linear                          | 0.7114         | 0.4618         | 0.3760         | 0.6573            | 0.3609         | 0.2589         | 0.5206             | 0.0727         | -0.1327        | 4425.55          | 0.16           | 2615.57        | 12.90          | 0.077          | 9.49           |
| 2F1                             | 0.8238         | 0.6143         | 0.6515         | 0.7424            | 0.4363         | 0.4907         | 0.5929             | -0.5210        | 0.2807         | 3758.24          | 0.26           | 1661.10        | 11.19          | 0.072          | 7.87           |
| Quadratic                       | 0.9759         | 0.8281         | 0.9911         | 0.9541            | 0.6733         | 0.9831         | 0.8211             | -0.4174        | 0.9354         | 1651.69          | 0.25           | 149.10         | 4.72           | 0.055          | 1.43           |
| Cubic                           | 0.9926         | 0.9979         | 0.9956         | 0.9766            | 0.9935         | 0.9859         | 0.0864             | 0.9647         | 0.1947         | 8433.93          | 0.006          | 1859.56        | 3.37           | 0.008          | 1.31           |

df: degree of freedom; PRESS: predicted residual error sum of squares. Y<sub>1</sub>: average particle size; Y<sub>2</sub>: PI; Y<sub>3</sub>: encapsulation efficiency.

Table S4 ANOVA for response surface quadratic model of measured responses.

|                         | Sum of squares |                |                | df             |                |                | F-value        |                |                | P-value (prob>F) |                |                |
|-------------------------|----------------|----------------|----------------|----------------|----------------|----------------|----------------|----------------|----------------|------------------|----------------|----------------|
|                         | Y <sub>1</sub> | Y <sub>2</sub> | Y <sub>3</sub> | Y <sub>1</sub> | Y <sub>2</sub> | Y <sub>3</sub> | Y <sub>1</sub> | Y <sub>2</sub> | Y <sub>3</sub> | Y <sub>1</sub>   | Y <sub>2</sub> | Y <sub>3</sub> |
| ANOVA                   |                |                |                |                |                |                |                |                |                |                  |                |                |
| NP% (X <sub>1</sub> )   | 1485.47        | 0.031          | 593.86         | 1              | 1              | 1              | 69.40          | 10.37          | 289.20         | <0.0001          | 0.0092         | <0.0001        |
| MIG% ( X <sub>2</sub> ) | 881.62         | 0.007          | 61.67          | 1              | 1              | 1              | 41.19          | 2.21           | 30.03          | <0.0001          | 0.1681         | 0.0003         |
| C/S (X <sub>3</sub> )   | 4200.11        | 0.043          | 212.63         | 1              | 1              | 1              | 196.23         | 14.29          | 103.55         | <0.0001          | 0.0036         | <0.0001        |
| Residual                | 235.44         | 0.030          | 20.53          | 11             | 10             | 10             | -              | -              | -              | -                | -              | -              |
| Lack-of-fit             | 205.39         | 0.030          | 18.68          | 6              | 5              | 5              | 5.70           | 88.78          | 10.10          | 0.8379           | 0.7899         | 0.6120         |
| Pure error              | 30.05          | 0.0003         | 1.85           | 5              | 5              | 5              | -              | -              | -              | -                | -              | -              |

Y<sub>1</sub>: average particle size; Y<sub>2</sub>: PI; Y<sub>3</sub>: encapsulation efficiency.
